# Supplementary material
Source: publisher figshare collection journal article supplement (https://karger.figshare.com/articles/dataset/_/27907005)
Supplement: Supplementary file 1 [file 4]

**Supplementary Table 1.** Hormone concentrations in all twin pairs and their subgroups at all four measured time-points

| **All twin pairs – hormone concentrations in nmol/L** | | | | | | | | | | | | | | | |
| --- | --- | --- | --- | --- | --- | --- | --- | --- | --- | --- | --- | --- | --- | --- | --- |
|  |  | **All pairs (n=46)** | | | |  | **Concordant (n=29)** | | | |  | **Discordant (n=17)** | | | |
|  | **Mean** | **SD** | **p** | **Ranks**  **- ; +; =** |  | **Mean** | **SD** | **p** | **Ranks**  **-; + ; =** |  | **Mean** | **SD** | **p** | **Ranks**  **- ; + ; =** |
|  |  |  |
| **Androstenedione** |  | | | | | | | | | | | | | | |
| **7 am** | **ST** | **0.91** | **1.76** | **0.475** | **15;18;11** |  | **0.58** | **1.37** | **0.763** | **10;9;9** |  | **1.48** | **2.23** | **0.124** | **5;9;2** |
| **LT** | **0.70** | **1.56** | **0.80** | **1.85** | **0.51** | **0.88** |
| **1 pm** | **ST** | **0.87** | **2.02** | **0.759** | **14;14;16** |  | **0.62** | **1.35** | **0.979** | **10;6;12** |  | **1.29** | **2.85** | **0.433** | **4;8;4** |
| **LT** | **0.52** | **1.13** | **0.35** | **0.81** | **0.80** | **1.54** |
| **6 pm** | **ST** | **0.41** | **0.74** | **0.673** | **16;13;15** |  | **0.29** | **0.55** | **0.163** | **11;5;12** |  | **0.62** | **0.98** | **0.382** | **5;8;3** |
| **LT** | **0.51** | **0.94** | **0.56** | **1.08** | **0.43** | **0.64** |
| **9 pm** | **ST** | **0.72** | **1.64** | **0.855** | **14;9;20** |  | **0.75** | **1.97** | **0.551** | **9;5;14** |  | **0.66** | **0.76** | **0.678** | **5;4;6** |
| **LT** | **0.56** | **1.10** | **0.58** | **1.18** | **0.54** | **0.96** |
|  | | | | | | | | | | | | | | | |
| **17 OHP** |  | | | | | | | | | | | | | | |
| **7 am** | **ST** | **0.07** | **0.13** | **0.101** | **9;16;19** |  | **0.08** | **0.16** | **0.179** | **6;10;12** |  | **0.04** | **0.06** | **0.312** | **3;6;7** |
| **LT** | **0.04** | **0.06** | **0.04** | **0.06** | **0.03** | **0.06** |
| **1 pm** | **ST** | **0.05** | **0.07** | **0.523** | **11;12;21** |  | **0.04** | **0.07** | **0.916** | **7;6;15** |  | **0.06** | **0.07** | **0.262** | **4;6;6** |
| **LT** | **0.03** | **0.06** | **0.04** | **0.07** | **0.03** | **0.07** |
| **6 pm** | **ST** | **0.02** | **0.04** | **0.842** | **8;7;29** |  | **0.03** | **0.05** | **0.635** | **5;4;19** |  | **0.01** | **0.05** | **0.528** | **3;3;10** |
| **LT** | **0.02** | **0.03** | **0.02** | **0.03** | **0.02** | **0.03** |
| **9 pm** | **ST** | **0.02** | **0.04** | **0.093** | **13;5;25** |  | **0.01** | **0.03** | **0.059** | **10;3;15** |  | **0.02** | **0.03** | **0.686** | **3;2;10** |
| **LT** | **0.04** | **0.07** | **0.04** | **0.06** | **0.04** | **0.03** |
|  | | | | | | | | | | | | | | | |
| **Progesterone** |  | | | | | | | | | | | | | | |
| **7 am** | **ST** | **1.85** | **3.18** | **0.371** | **20;20;4** |  | **1.04** | **2.42** | **0.536** | **14;11;3** |  | **3.27** | **3.87** | **0.018** | **6;9;1** |
| **LT** | **0.94** | **1.40** | **1.07** | **1.72** | **0.72** | **0.42** |
| **1 pm** | **ST** | **1.15** | **1.44** | **0.946** | **19;21;4** |  | **1.01** | **1.39** | **0.530** | **14;10;4** |  | **1.39** | **1.56** | **0.501** | **5;11;0** |
| **LT** | **1.47** | **2.75** | **1.24** | **1.93** | **1.87** | **3.83** |
| **6 pm** | **ST** | **1.44** | **2.74** | **0.954** | **17;21;6** |  | **0.95** | **1.75** | **0.438** | **11;12;5** |  | **2.29** | **3.85** | **0.394** | **6;9;1** |
| **LT** | **1.26** | **2.27** | **1.39** | **2.77** | **1.03** | **0.89** |
| **9 pm** | **ST** | **1.72** | **3.19** | **0.904** | **22;21;0** |  | **1.80** | **3.75** | **0.554** | **16;12;0** |  | **1.58** | **1.85** | **0.495** | **6;9;0** |
| **LT** | **1.30** | **2.55** | **1.33** | **2.79** | **1.25** | **2.12** |
|  | | | | | | | | | | | | | | | |
| **DHEAS** |  | | | | | | | | | | | | | | |
| **7 am** | **ST** | **39.49** | **78.13** | **0.421** | **12;7;25** |  | **39.51** | **83.28** | **0.583** | **7;5;16** |  | **39.45** | **70.81** | **0.612** | **5;2;9** |
| **LT** | **49.57** | **73.57** | **50.07** | **74.30** | **48.70** | **74.70** |
| **1 pm** | **ST** | **36.96** | **69.71** | **1.000** | **9;7;28** |  | **27.25** | **59.59** | **0.674** | **5;3;20** |  | **53.95** | **83.99** | **0.674** | **4;4;8** |
| **LT** | **38.53** | **74.26** | **29.04** | **63.90** | **55.12** | **89.42** |
| **6 pm** | **ST** | **41.00** | **73.03** | **0.575** | **11;9;24** |  | **30.04** | **68.93** | **0.575** | **5;3;20** |  | **58.86** | **78.74** | **0.638** | **6;6;4** |
| **LT** | **46.56** | **77.68** | **37.29** | **73.29** | **62.79** | **84.79** |
| **9 pm** | **ST** | **53.80** | **79.67** | **0.601** | **7;12;24** |  | **43.24** | **77.94** | **0.480** | **7;5;16** |  | **73.53** | **81.77** | **0.018** | **0;7;8** |
| **LT** | **53.23** | **85.69** | **59.86** | **93.46** | **40.86** | **70.23** |
|  | | | | | | | | | | | | | | | |
| **DHEA** |  | | | | | | | | | | | | | | |
| **7 am** | **ST** | **1.92** | **1.87** | **0.361** | **26;15;3** |  | **2.11** | **1.92** | **0.513** | **14;11;3** |  | **1.58** | **1.78** | **0.070** | **12;4;0** |
| **LT** | **2.12** | **1.43** | **1.94** | **1.40** | **2.42** | **1.46** |
| **1 pm** | **ST** | **1.38** | **2.18** | **0.657** | **20;14;10** |  | **1.19** | **1.26** | **0.773** | **13;10;5** |  | **1.72** | **3.24** | **0.722** | **7;4;5** |
| **LT** | **1.24** | **1.33** | **1.19** | **1.16** | **1.32** | **1.63** |
| **6 pm** | **ST** | **0.96** | **1.36** | **0.145** | **19;16;9** |  | **0.94** | **1.17** | **0.737** | **9;11;8** |  | **0.99** | **1.68** | **0.088** | **10;5;1** |
| **LT** | **1.45** | **1.47** | **1.05** | **1.16** | **2.15** | **1.72** |
| **9 pm** | **ST** | **1.37** | **1.54** | **0.578** | **17;17;9** |  | **1.27** | **1.41** | **0.639** | **10;11;7** |  | **1.56** | **1.80** | **0.917** | **7;6;2** |
| **LT** | **1.23** | **1.28** | **1.13** | **1.08** | **1.42** | **1.62** |

**Data expressed as: mean, SD and P; LT = Larger twins, ST = Smaller twins; Concordant = bw difference of < 1 SDS,**

**Discordant = bw difference of ≥ 1 SDS; Ranks: - indicates ST < LT, = indicates ST = LT; + indicates ST > LT**
