# Supplementary material
Source: publisher figshare collection journal article supplement (https://karger.figshare.com/articles/dataset/_/27907005)

**Supplementary Figure 1. Flowchart**

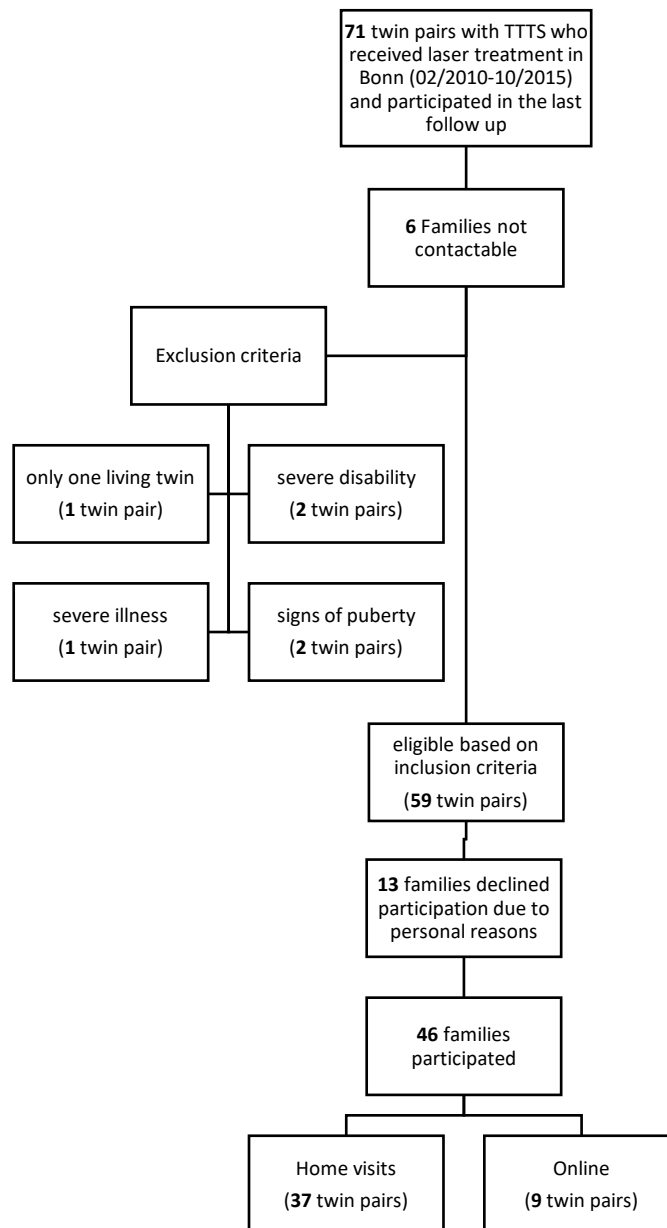

Supplement: Supplementary file 1 [file 4]
